# Supplementary material for: A pyridomethene–BF2 complex-based chemosensor for detection of hydrazine
Source: Royal Society of Chemistry journal article supplement (doi:10.1039/c3ra42717j), 2013-01-01
Supplement: c3ra42717j.pdf [file c3ra42717j.pdf]

# A pyridomethene-BF<sub>2</sub> complex-based chemosensor for detection of hydrazine

Yan-Duo Lin and Tahsin J. Chow<sup>\*a</sup>

<sup>a</sup> Institute of Chemistry, Academia Sinica, Taipei 115 Taiwan

[tjchow@chem.sinica.edu.tw](mailto:tjchow@chem.sinica.edu.tw)

Supporting Information

## Contents:

|            |                                                                                                                                                                                                                                                                                                                                                                                                                                                                                                                                                                                                                                                                                                                                                                 |
|------------|-----------------------------------------------------------------------------------------------------------------------------------------------------------------------------------------------------------------------------------------------------------------------------------------------------------------------------------------------------------------------------------------------------------------------------------------------------------------------------------------------------------------------------------------------------------------------------------------------------------------------------------------------------------------------------------------------------------------------------------------------------------------|
| S1         | Table of Contents                                                                                                                                                                                                                                                                                                                                                                                                                                                                                                                                                                                                                                                                                                                                               |
| S2, S3, S4 | <sup>1</sup> H, <sup>13</sup> C, and <sup>19</sup> F NMR spectra of <b>3</b> .                                                                                                                                                                                                                                                                                                                                                                                                                                                                                                                                                                                                                                                                                  |
| S5, S6, S7 | <sup>1</sup> H, <sup>13</sup> C, and <sup>19</sup> F NMR spectra of <b>PBF<sub>2</sub></b> .                                                                                                                                                                                                                                                                                                                                                                                                                                                                                                                                                                                                                                                                    |
| S8         | <b>Figure S7.</b> Time-dependent absorption spectra of sensor <b>PBF<sub>2</sub></b> (1 x 10 <sup>-5</sup> M) upon the addition of hydrazine (10 equiv) in a mixture of acetate buffer (pH 4.0, 10 mM) and DMSO (1/9, v/v). The arrows indicate the change of incubation time 0 to 8 mins.                                                                                                                                                                                                                                                                                                                                                                                                                                                                      |
| S9         | <b>Figure S8.</b> Normalized absorption spectra of <b>PBF<sub>2</sub></b> in cyclohexane, toluene, THF, ethyl acetate, dichloromethane, and acetonitrile.                                                                                                                                                                                                                                                                                                                                                                                                                                                                                                                                                                                                       |
| S10        | <b>Figure S9.</b> (a) Absorption and (b) fluorescence spectra of <b>PBF<sub>2</sub></b> (1 x 10 <sup>-5</sup> M in a mixture of acetate buffer (pH 4.0, 10 mM) and DMSO (1/9, v/v)) in the presence of hydrazine and ions (F <sup>-</sup> , Cl <sup>-</sup> , Br <sup>-</sup> , I <sup>-</sup> , CN <sup>-</sup> , ClO <sub>4</sub> <sup>-</sup> , H <sub>2</sub> PO <sub>4</sub> <sup>-</sup> , HSO <sub>4</sub> <sup>-</sup> , NO <sub>3</sub> <sup>-</sup> , CH <sub>3</sub> CO <sub>2</sub> <sup>-</sup> , Li <sup>+</sup> , Na <sup>+</sup> , K <sup>+</sup> , Cs <sup>+</sup> , Ag <sup>+</sup> , Ba <sup>2+</sup> , Ca <sup>2+</sup> , Mg <sup>2+</sup> , Co <sup>2+</sup> , Cu <sup>2+</sup> , Pb <sup>2+</sup> , Zn <sup>2+</sup> , Y <sup>3+</sup> ). |
| S11        | <b>Figure S10.</b> The fluorescence intensity of sensor <b>PBF<sub>2</sub></b> (1 x 10 <sup>-5</sup> M) incubated with hydrazine (2 x 10 <sup>-4</sup> M) for 0-8 min.                                                                                                                                                                                                                                                                                                                                                                                                                                                                                                                                                                                          |
| S12        | <b>Figure S11.</b> The simulated absorption spectra of sensor <b>PBF<sub>2</sub></b> (black line) and <b>PBF<sub>2</sub>-NH<sub>2</sub></b> (red line).                                                                                                                                                                                                                                                                                                                                                                                                                                                                                                                                                                                                         |
| S13        | <b>Figure S12.</b> IR spectra of probe <b>PBF<sub>2</sub></b> (upper line), <b>PBF<sub>2</sub></b> upon addition of hydrazine (bottom line).                                                                                                                                                                                                                                                                                                                                                                                                                                                                                                                                                                                                                    |
| S14        | <b>Figure S13.</b> <sup>1</sup> H NMR spectra for a continuous change of <b>PBF<sub>2</sub></b> to <b>PBF<sub>2</sub>-NH<sub>2</sub></b> .                                                                                                                                                                                                                                                                                                                                                                                                                                                                                                                                                                                                                      |
| S15        | <b>Figures S14 and S15.</b> The absorption and emission spectra of <b>PBF<sub>2</sub></b> upon the addition of n-propylamine.                                                                                                                                                                                                                                                                                                                                                                                                                                                                                                                                                                                                                                   |
| S16        | <b>Figure S16.</b> Changes of spectral intensity at different pH.                                                                                                                                                                                                                                                                                                                                                                                                                                                                                                                                                                                                                                                                                               |

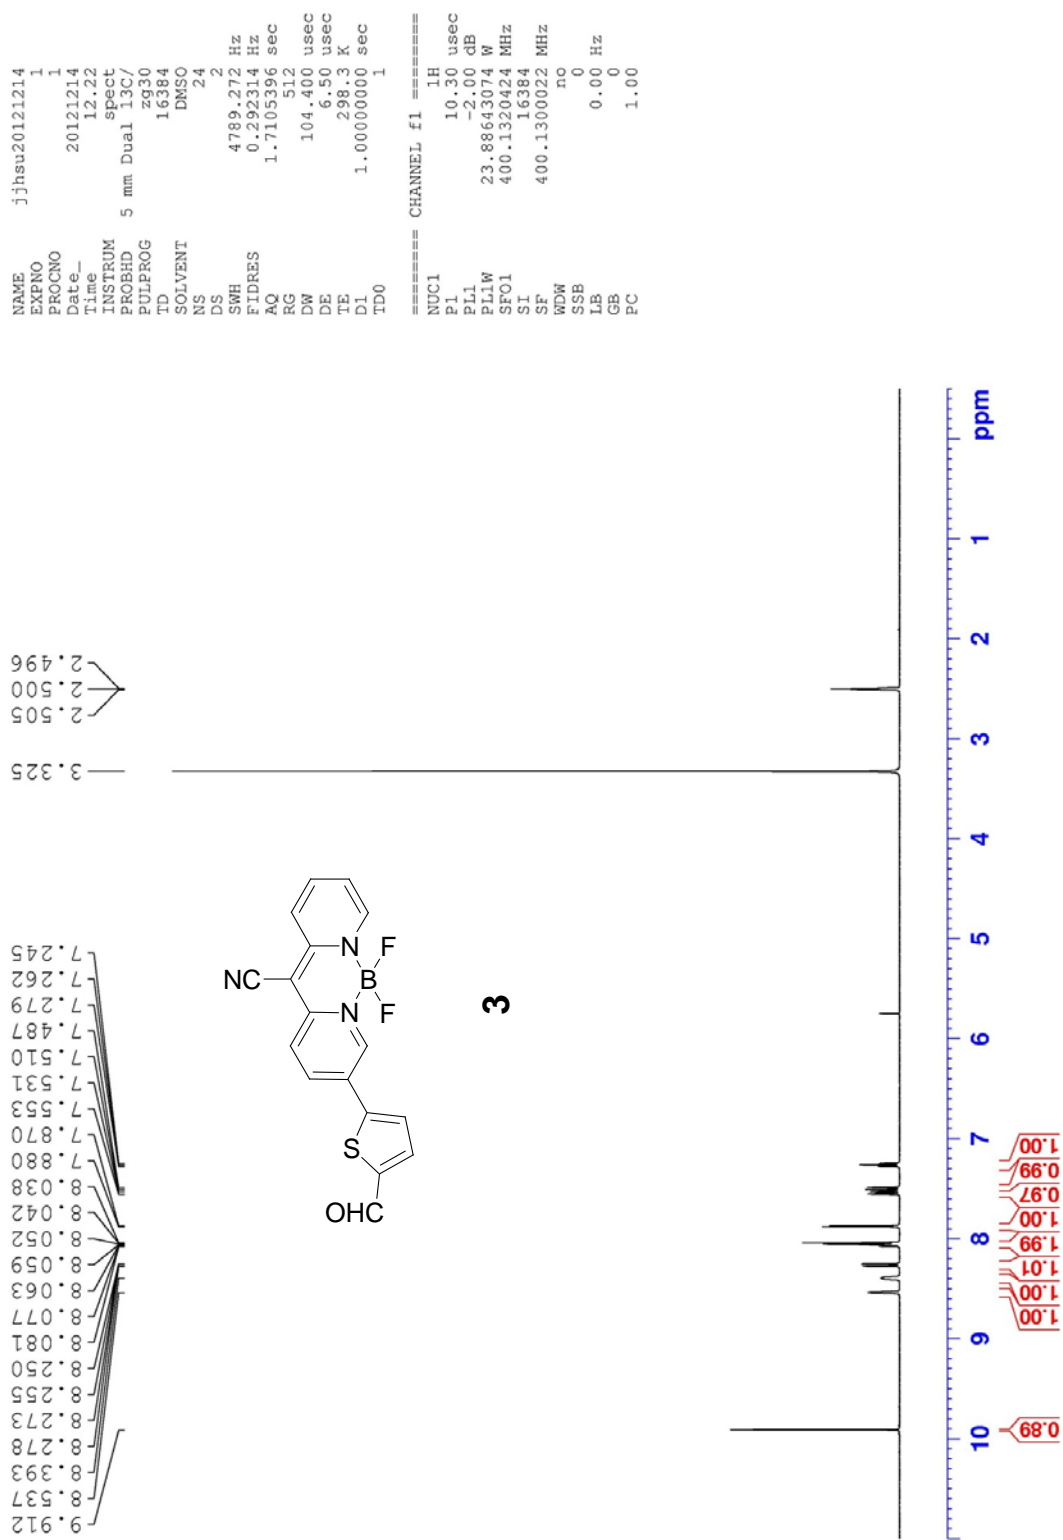

**Figure S1.**  $^1\text{H}$  NMR spectrum of **3**

```
NAME jjhsu20121214
EXPNO 2
PROCNO 1
Date_ 20121214
Time_ 12.26
INSTRUM spect
PROBHD 5 mm Dual 13C/
PULPROG zgpg30
TD 32768
SOLVENT DMSO
NS 2373
DS 8
SWH 23980.814 Hz
FIDRES 0.731836 Hz
AQ 0.6832628 sec
RG 9195.2
DW 20.850 usec
DE 6.50 usec
TE 298.5 K
D1 3.0000000 sec
D11 0.03000000 sec
TD0 1

===== CHANNEL f1 =====
NUC1 13C
P1 6.00 usec
PL1 -1.00 dB
PL1W 47.43416595 W
SF01 100.6228293 MHz

===== CHANNEL f2 =====
CPDPRG2 waltz16
NUC2 1H
PCPD2 90.00 usec
PL2 12.00 dB
PL2W 23.88643074 W
PL3W 0.38739258 W
SF02 400.1518764 MHz
SI 32768
SF 100.6128193 MHz
EM
WDW 0
SSB 0
LB 3.00 Hz
GB 0
PC 1.40
```

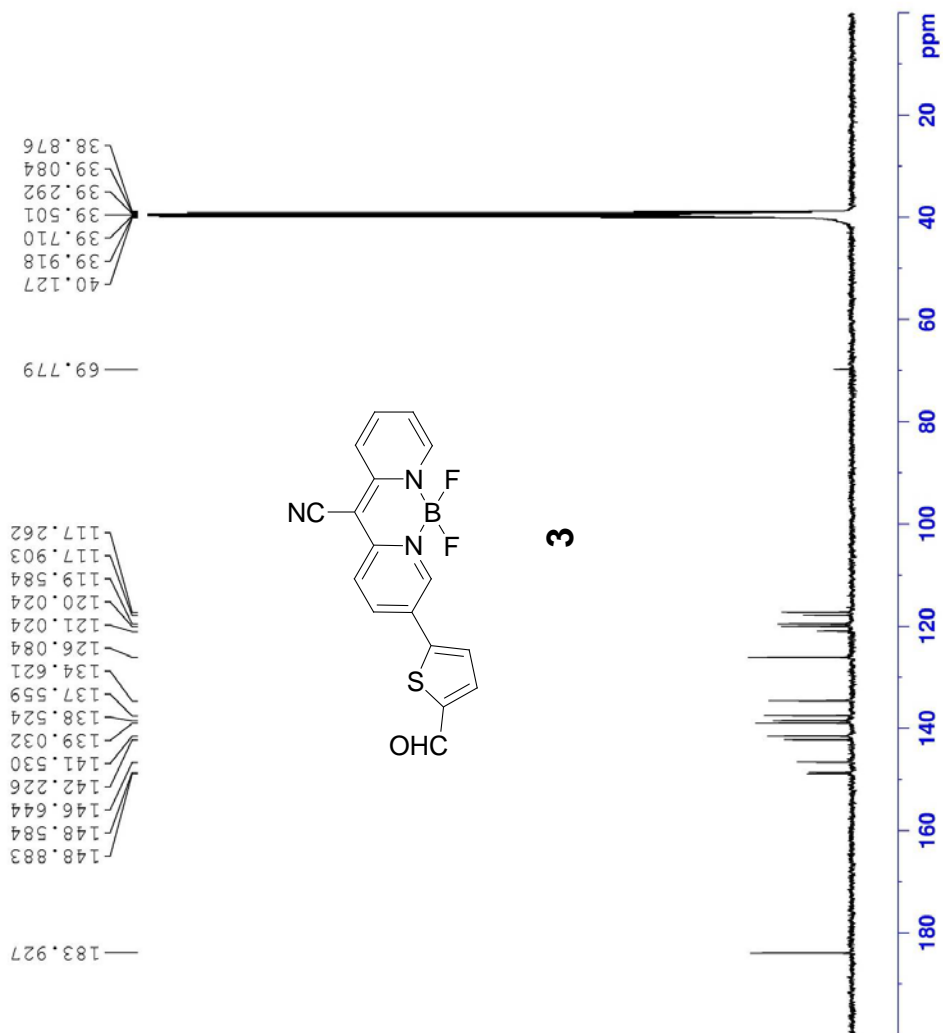

Figure S2.  $^{13}\text{C}$  NMR spectrum of **3**

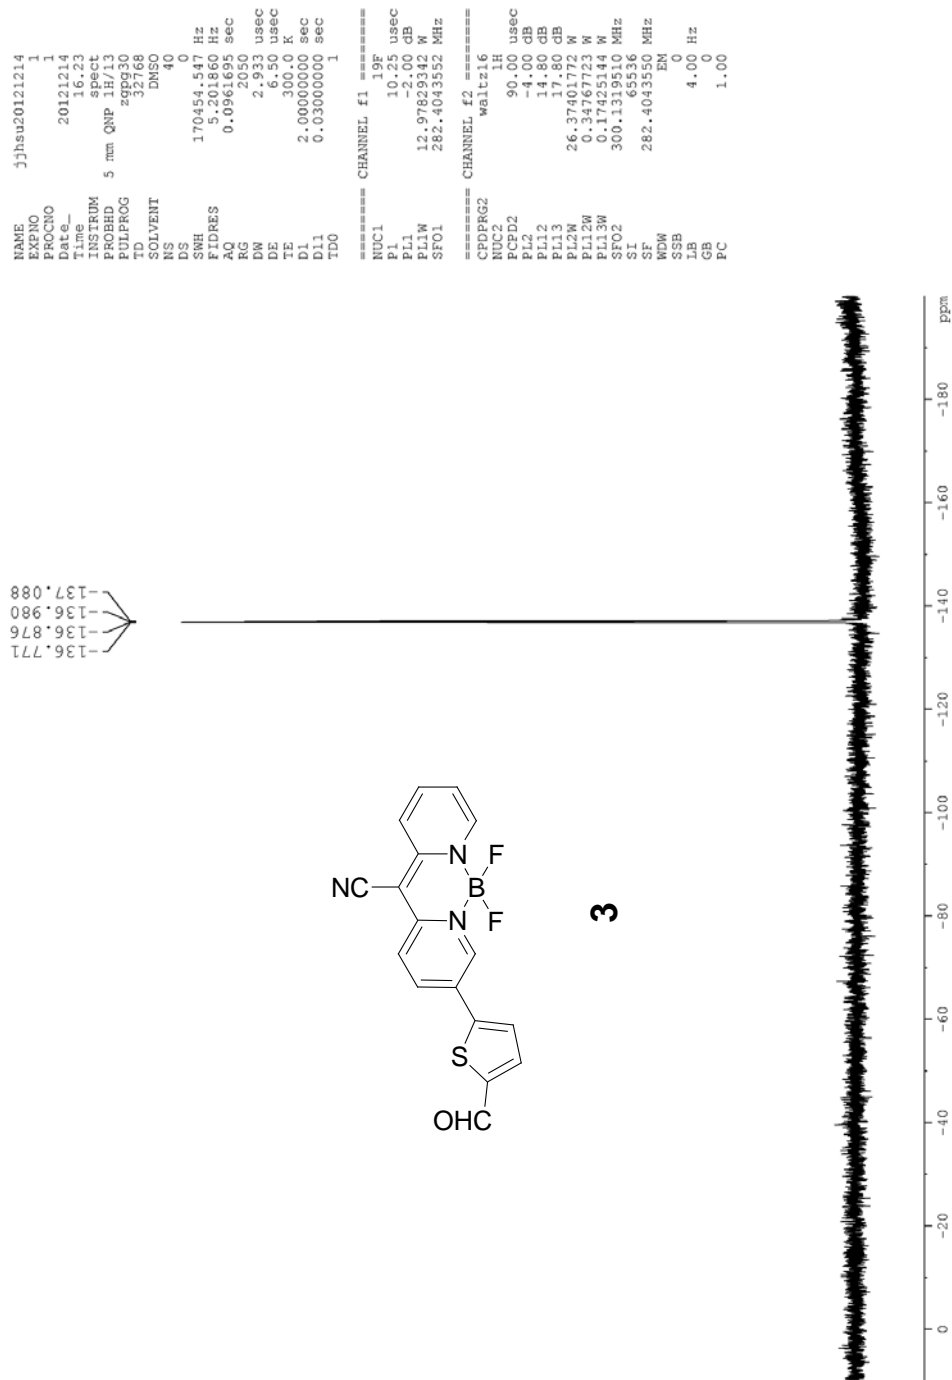

Figure S3.  $^{19}\text{F}$  NMR spectrum of **3**

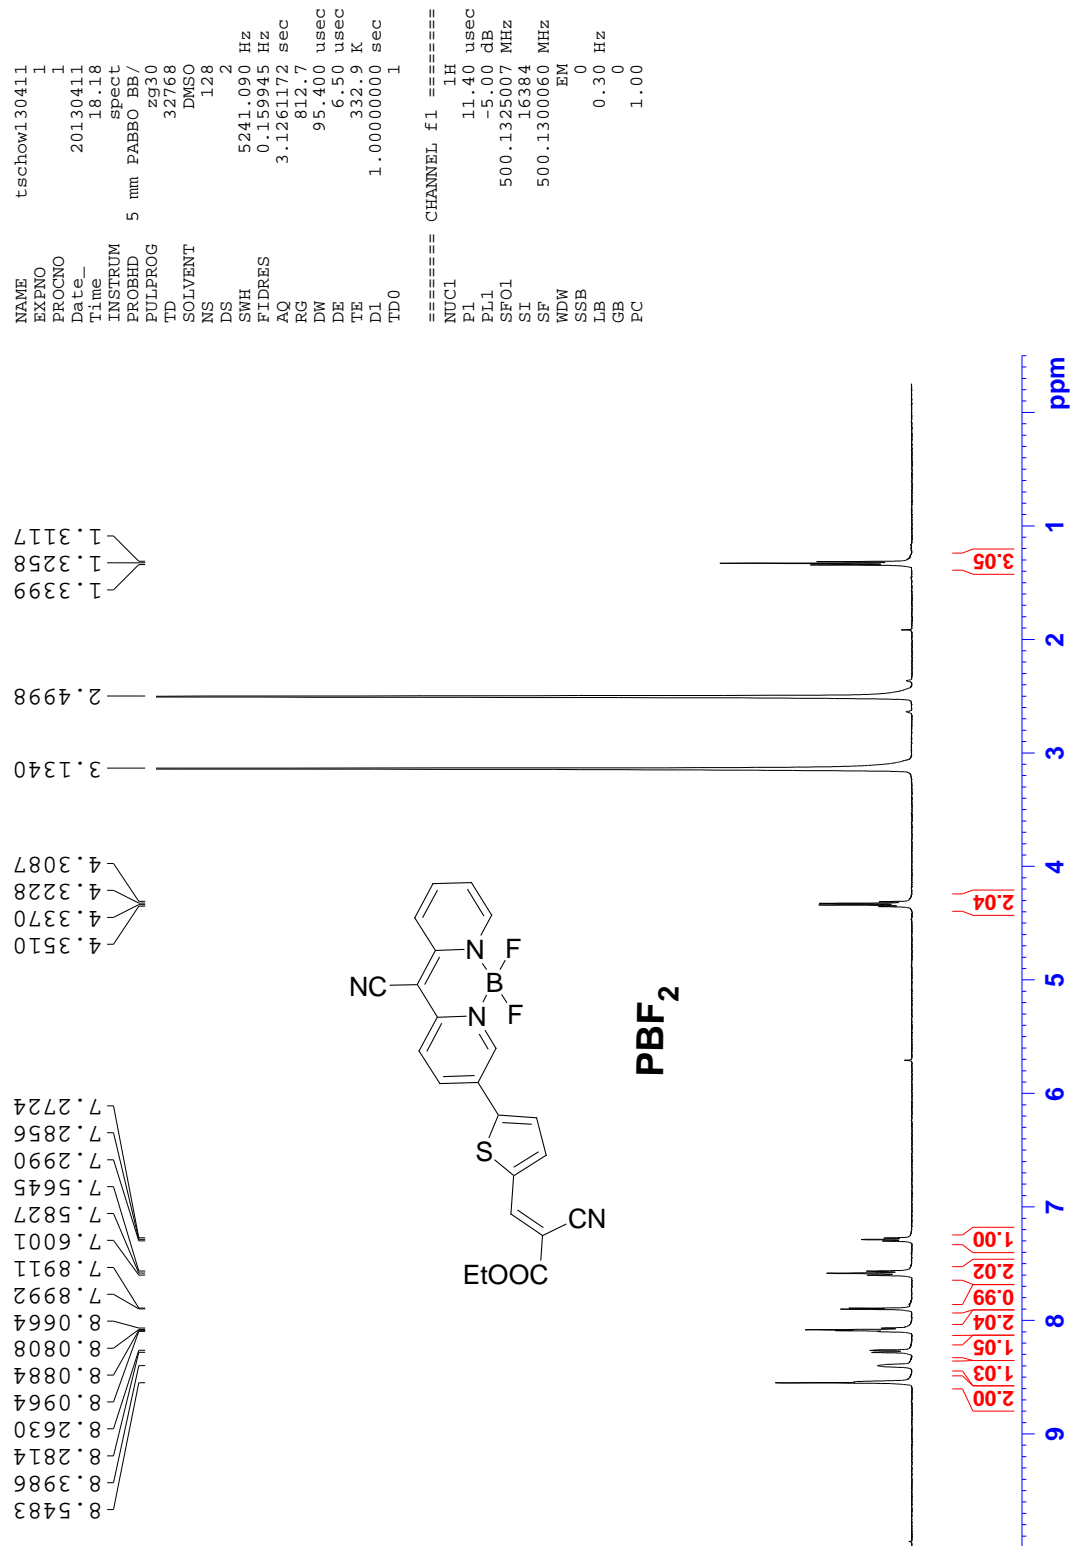

**Figure S4.** <sup>1</sup>H NMR spectrum of PBF<sub>2</sub>

```

NAME          tschow130411
EXPNO         2
PROCNO        1
Date_         20130412
Time         9.43
INSTRUM       spect
PROBHD        5 mm PABBO BB/
PULPROG       zgpg30
TD            32768
SOLVENT       CDCl3
NS            15282
DS            2
SWH           28901.734 Hz
FIDRES       0.882011 Hz
AQ           0.5669364 sec
RG           130004
DE           17.300 usec
TE           6.50 usec
D1           333.0 K
d11          3.00000000 sec
TD0          0.03000000 sec
===== CHANNEL f1 =====
NUC1          13C
P0            4.00 usec
PL1           3.00 dB
SFO1         125.7716224 MHz
===== CHANNEL f2 =====
CPDPRG2      waltz16
NUC2          1H
PCPD2        90.00 usec
PL2          -5.00 dB
PL12         14.60 dB
SFO2         500.1320000 MHz
SI           32768
SF           125.7578899 MHz
WDW           EM
SSB           0
LB           2.00 Hz
GB           0
PC           1.00
    
```

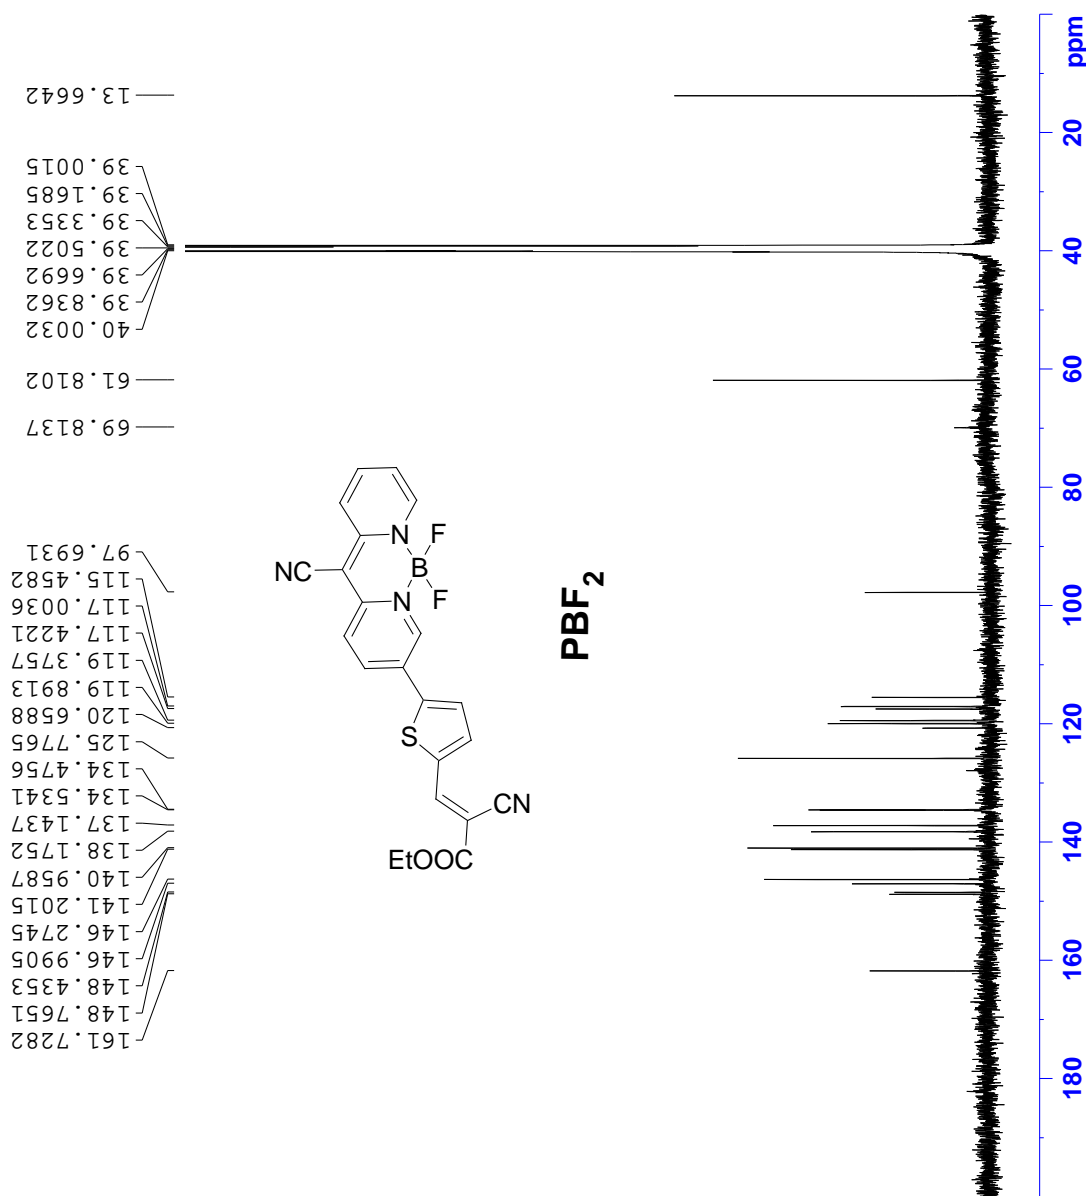

**Figure S5.** <sup>13</sup>C NMR spectrum of PBF<sub>2</sub>

```
tschow130411
NAME
EXPNO 3
PROCNO 1
Date_ 20130411
Time 18.03
INSTRUM spect
PROBHD 5 mm PABBO BB/
PULPROG zgpg30
TD 131072
SOLVENT CDC13
NS 32
DS 2
SWH 46948.355 Hz
FIDRES 0.358188 Hz
AQ 1.3959668 sec
RG 2048
DE 10.650 usec
TE 333.2 K
D1 1.00000000 sec
d11 0.03000000 sec
d12 0.00002000 sec
TD0 1

===== CHANNEL f1 =====
NUC1 19F
P1 13.60 usec
PL1 -5.00 dB
SFO1 470.5264790 MHz

===== CHANNEL f2 =====
CPDPRG2 waltz16
NUC2 1H
PCPD2 90.00 usec
PL2 -5.00 dB
PL12 14.60 dB
SFO2 500.1320000 MHz
SI 65536
SF 470.5923620 MHz
WDW EM
SSB 0
LB 0.30 Hz
GB 0
PC 1.00
```

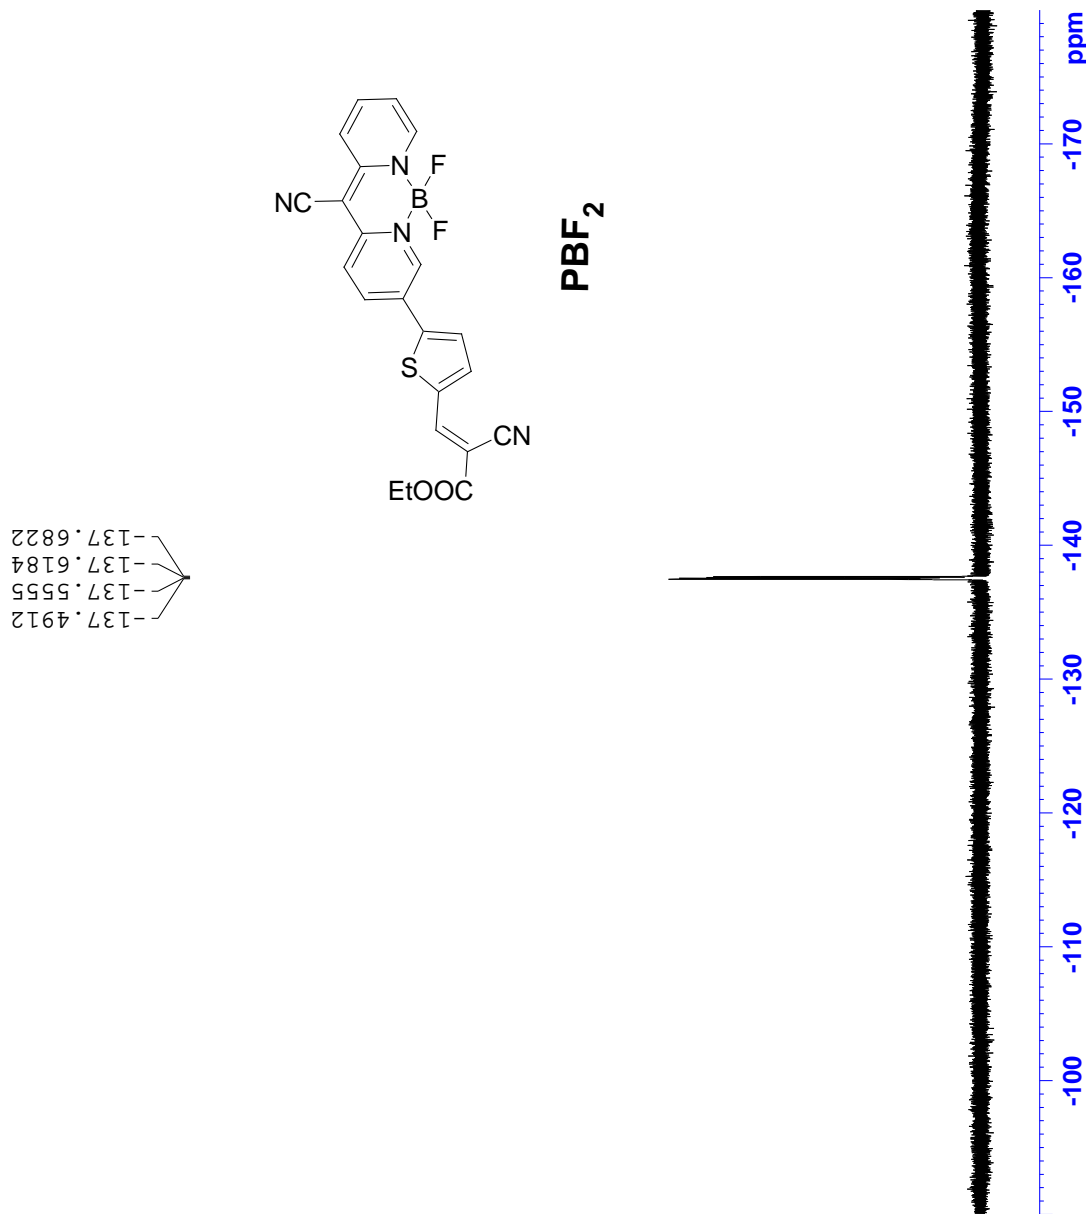

Figure S6. <sup>19</sup>F NMR spectrum of PBF<sub>2</sub>

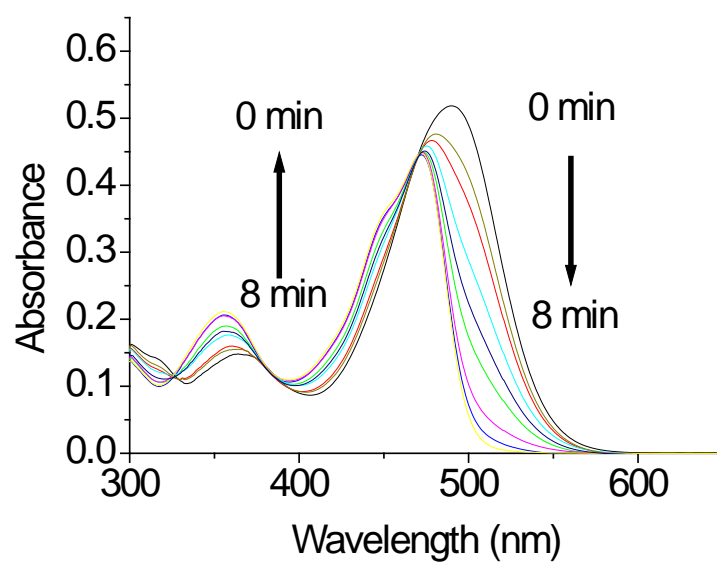

**Figure S7.** Time-dependent absorption spectra of sensor  $\text{PBF}_2$  ( $1 \times 10^{-5} \text{ M}$ ) upon the addition of hydrazine (10 equiv) in a mixture of acetate buffer (pH 4.0, 10 mM) and DMSO (1/9, v/v). The arrows indicate the change of incubation time 0 to 8 min.



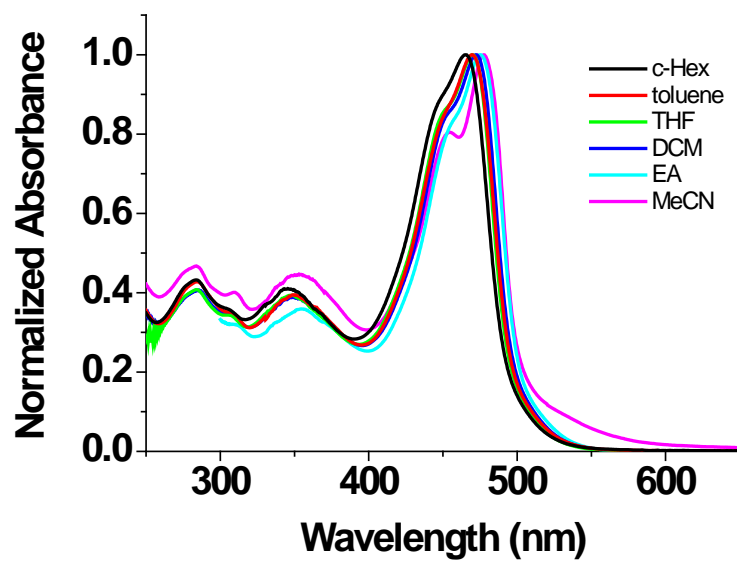

**Figure S8.** Normalized absorption spectra of **PBF<sub>2</sub>** in cyclohexane, toluene, THF, ethyl acetate, dichloromethane, and acetonitrile.

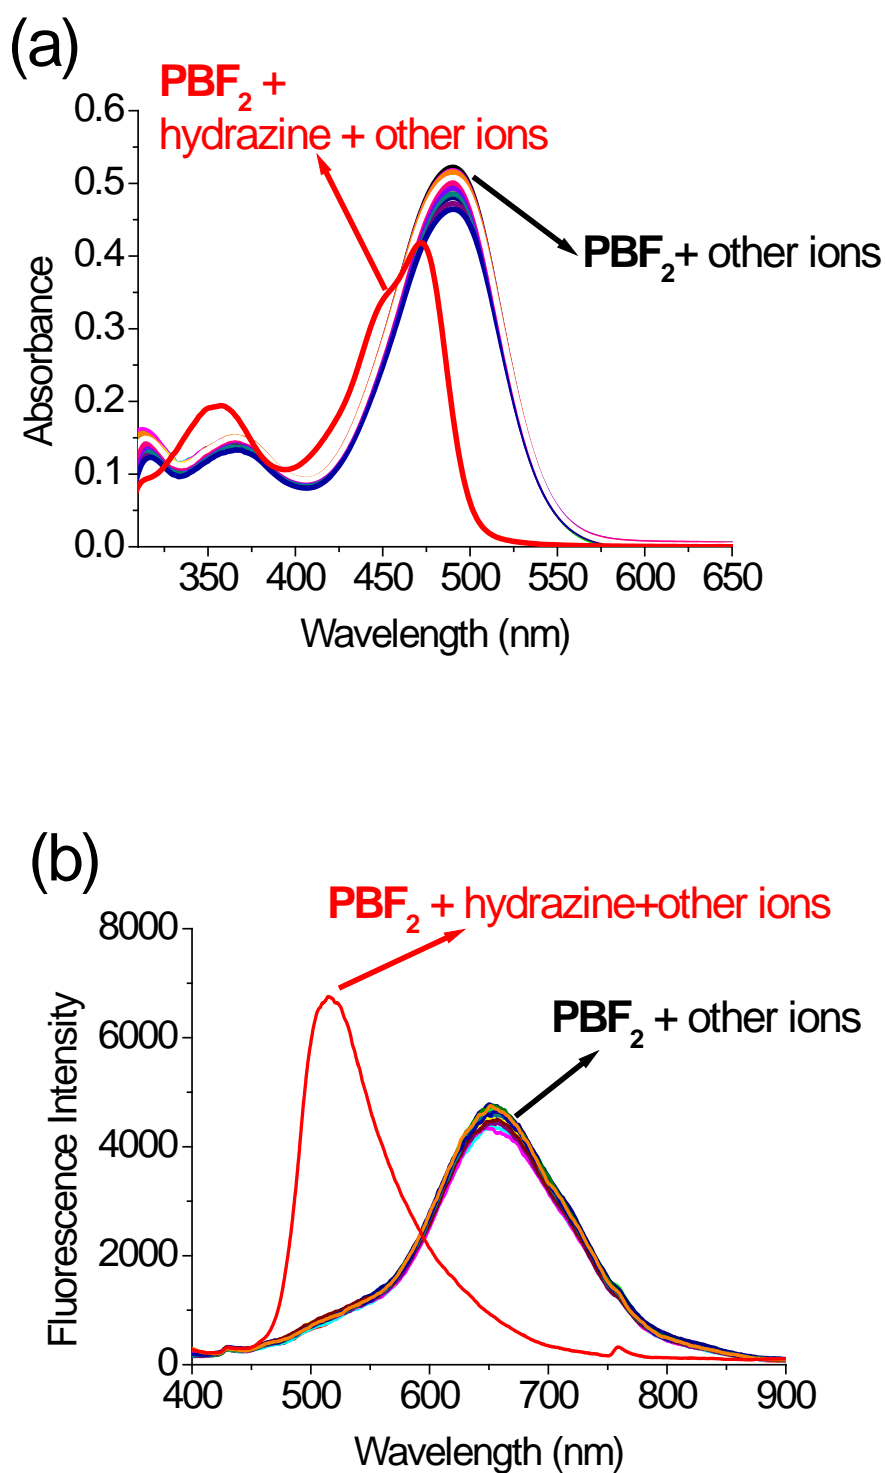

**Figure S9.** (a) Absorption and (b) fluorescence spectra of **PBF<sub>2</sub>** ( $1 \times 10^{-5}$  M in a mixture of acetate buffer (pH 4.0, 10 mM) and DMSO (1/9, v/v)) in the presence of hydrazine and ions ( $F^{-}$ ,  $Cl^{-}$ ,  $Br^{-}$ ,  $I^{-}$ ,  $CN^{-}$ ,  $ClO_4^{-}$ ,  $H_2PO_4^{-}$ ,  $HSO_4^{-}$ ,  $NO_3^{-}$ ,  $CH_3CO_2^{-}$ ,  $Li^{+}$ ,  $Na^{+}$ ,  $K^{+}$ ,  $Cs^{+}$ ,  $Ag^{+}$ ,  $Ba^{2+}$ ,  $Ca^{2+}$ ,  $Mg^{2+}$ ,  $Co^{2+}$ ,  $Cu^{2+}$ ,  $Pb^{2+}$ ,  $Zn^{2+}$ ,  $Y^{3+}$ ).

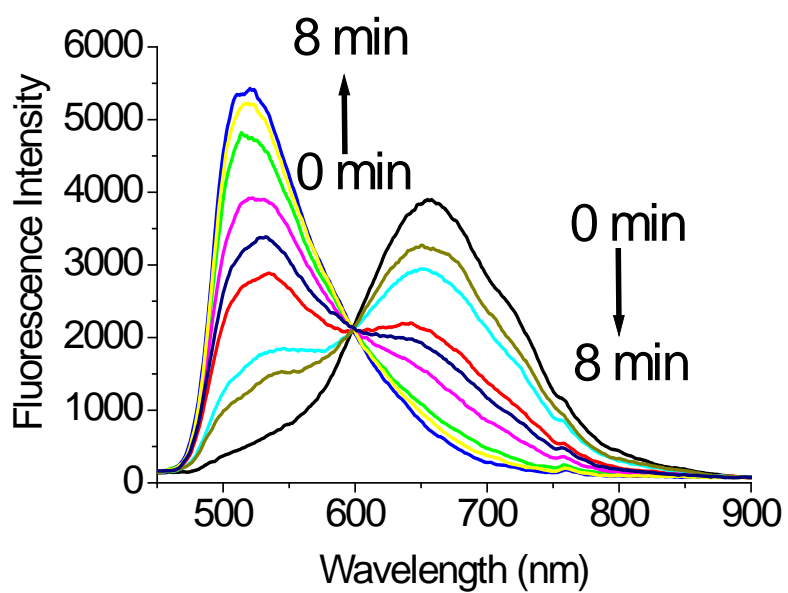

**Figure S10.** The fluorescence intensity of sensor **PBF<sub>2</sub>** ( $1 \times 10^{-5}$  M) incubated with hydrazine ( $2 \times 10^{-4}$  M) for 0-8 min.

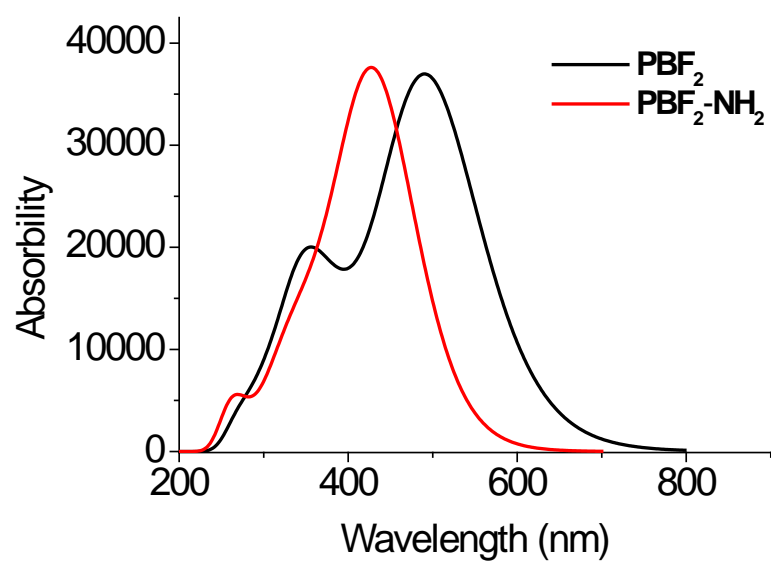

**Figure. S11** The simulated absorption spectra of sensor  $\text{PBF}_2$  (black line) and  $\text{PBF}_2\text{-NH}_2$  (red line).

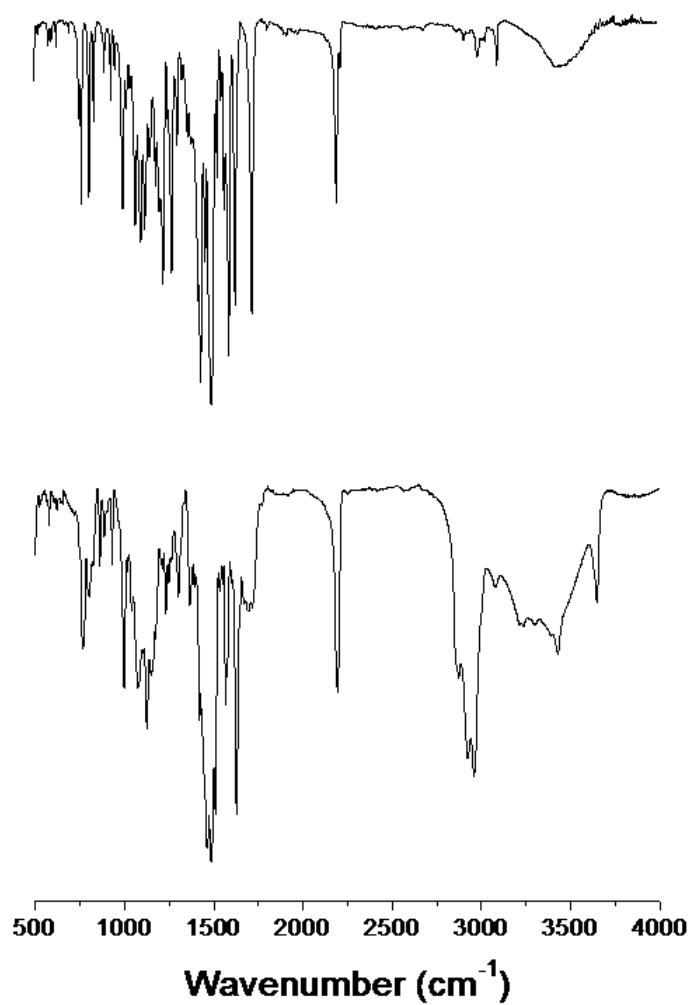

**Figure S12.** IR spectra of probe **PBF**<sub>2</sub> (upper line), and **PBF**<sub>2</sub> upon addition of hydrazine (bottom line).

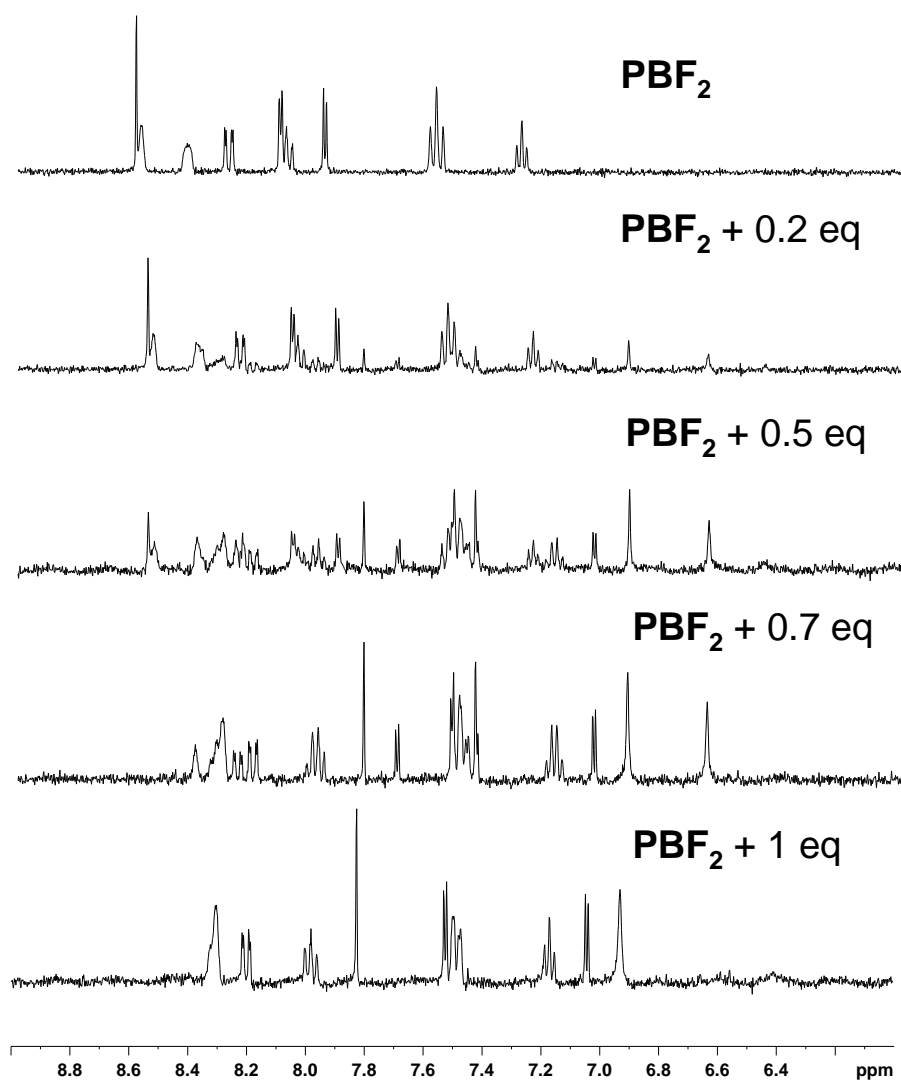

**Figure S13.**  $^1\text{H}$  NMR spectra for a continuous change of  $\text{PBF}_2$  to  $\text{PBF}_2\text{-NH}_2$ .

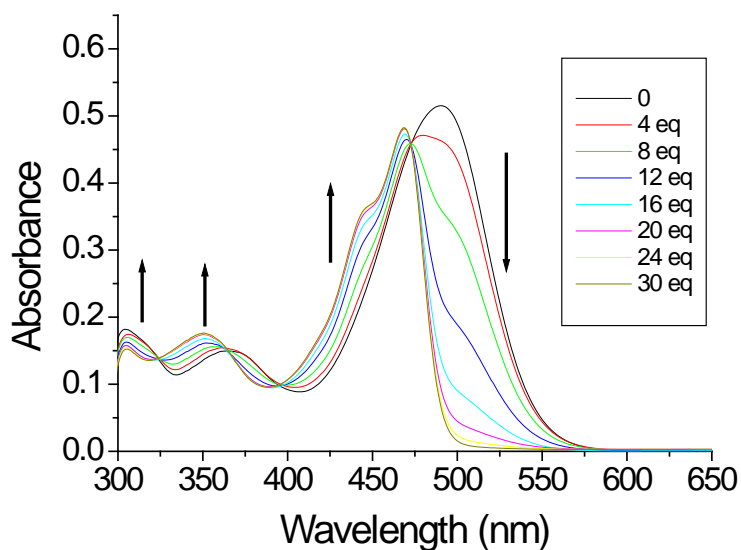

**Figure S14.** Change of absorption spectrum of **PBF<sub>2</sub>** ( $1 \times 10^{-5}$  M) upon the addition of *n*-propylamine (0~30 equiv at 4.0 equiv interval) in a mixed solvent of an acetate buffer (pH 4.0, 10 mM) and DMSO (1/9, v/v).

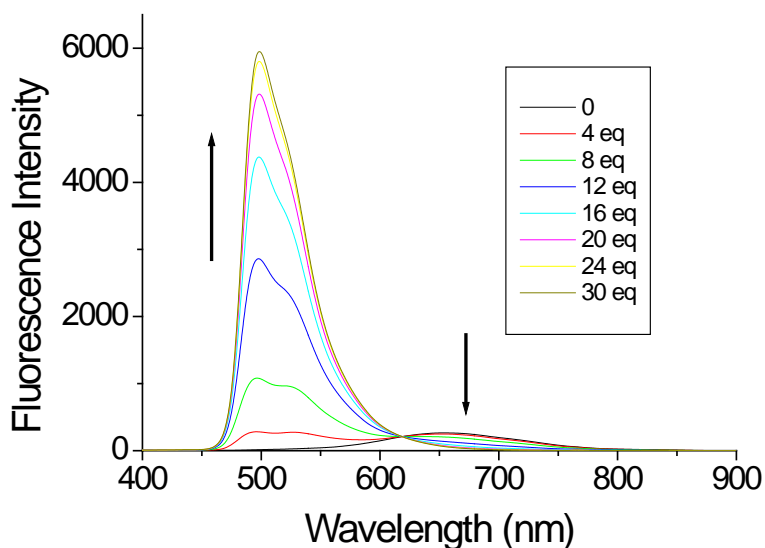

**Figure S15.** Fluorescence titration spectra of **PBF<sub>2</sub>** ( $1 \times 10^{-5}$  M in a mixture of acetate buffer (pH 4.0, 10 mM) and DMSO (1/9, v/v)) solution with different concentrations of *n*-propylamine (0~30 equiv at 4.0 equiv interval).

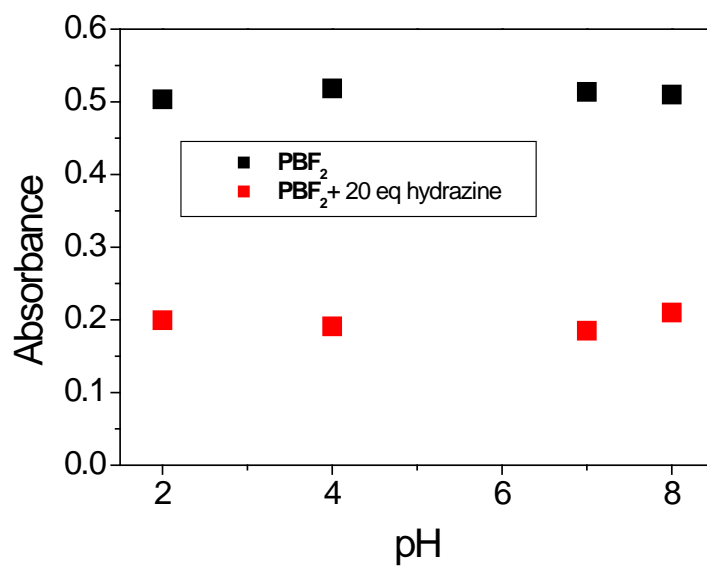

**Figure S16.** Changes of spectral intensity at different pH. The absorption intensity (490 nm) of  $\text{PBF}_2$  ( $1 \times 10^{-5}$  M) solutions in a mixture of acetate buffer (pH 4.0, 10 mM) and DMSO (1/9, v/v) with and without hydrazine (20 equiv.).
